# Supplementary material for: Supercritical CO2 assisted extraction of essential oil and naringin from Citrus grandis peel: in vitro antimicrobial activity and docking study
Source: Royal Society of Chemistry journal article supplement (doi:10.1039/d2ra04068a), 2022-01-01
Supplement: d2ra04068a1.pdf [file d2ra04068a1.pdf]

**Supercritical CO<sub>2</sub> assisted extraction of essential oil and naringin from  
*Citrus grandis* peels: *in vitro* antimicrobial activity and docking study**

Thanh-Chi Mai<sup>1,2\*</sup>, Ngoc-Thinh Tran<sup>1</sup>, Dinh-Tri Mai<sup>1,2</sup>, Tran Thi Ngoc Mai<sup>3</sup>,  
Nguyen Hong Thuc Duyen<sup>4</sup>, Tran Nguyen Minh An<sup>4\*</sup>, Mahboob Alam<sup>5</sup>, Chi-  
Hien Dang<sup>1,2</sup>, Thanh-Danh Nguyen<sup>1,2\*</sup>

<sup>1</sup>Institute of Chemical Technology, Vietnam Academy of Science and  
Technology, 1A, TL29, District 12, Ho Chi Minh City, Vietnam.

<sup>2</sup>Graduate University of Science and Technology, Vietnam Academy of  
Science and Technology, 18 Hoang Quoc Viet, Cau Giay, Hanoi, Viet Nam.

<sup>3</sup>Institute of Applied Sciences, HUTECH University, Ho Chi Minh City, Viet  
Nam, 475A Dien Bien phu Street, Ward 25, Binh Thanh District, Ho Chi  
Minh City, Vietnam.

<sup>4</sup>Faculty of Chemical Engineering, Industrial University of Ho Chi Minh  
City, Ho Chi Minh City 71420, Vietnam.

<sup>5</sup>Department of Safety Engineering, Dongguk University, 123 Dongdae-ro,  
Gyeongju-si 780714, Gyeongsangbuk-do, Republic of Korea

Corresponding Authors: [maithanhchi@yahoo.com.vn](mailto:maithanhchi@yahoo.com.vn) (T.C. Mai),  
[trannguyenminhan@iuh.edu.vn](mailto:trannguyenminhan@iuh.edu.vn) (T.N. M. An), [ntdanh@ict.vast.vn](mailto:ntdanh@ict.vast.vn) (T.D.  
Nguyen).

## Supplementary Data

**Table S1.** Physicochemical properties of compound *d*-limonene

| Property         | Value   | Comment                                                      |
|------------------|---------|--------------------------------------------------------------|
| Molecular weight | 136.13  | Contain hydrogen atoms. Optimal: 100–600                     |
| Volume           | 167.687 | Van der Waals volume                                         |
| nHA              | 0       | Number of hydrogen bond acceptors.<br>Optimal: 0–12          |
| nHD              | 0       | Number of hydrogen bond donors.<br>Optimal: 0–7              |
| nRot             | 1       | Number of rotatable bonds. Optimal: 0–11                     |
| nRing            | 1       | Number of rings. Optimal: 0–6                                |
| MaxRing          | 6       | Number of atoms in the biggest ring.<br>Optimal: 0–18        |
| nHet             | 0       | Number of heteroatoms. Optimal: 1–15                         |
| fChar            | 0       | Formal charge. Optimal: –4~4                                 |
| nRig             | 7       | Number of rigid bonds. Optimal: 0–30                         |
| Flexibility      | 0.143   | Flexibility = nRot/nRig                                      |
| Stereocenters    | 1       | Optimal: ≤2                                                  |
| TPSA             | 0       | Topological polar surface area. Optimal: 0–140               |
| logS             | -4.239  | Log of the aqueous solubility. Optimal: –4–0.5 log mol/L     |
| logP             | 4.368   | Log of the octanol/water partition coefficient. Optimal: 0–3 |
| logD             | 3.469   | logP at physiological pH 7.4. Optimal: 1–3                   |

**Table S2.** Medicinal chemistry compound *d*-limonene.

| Property         | Value    | Comment                                                                                                                                                                                        |
|------------------|----------|------------------------------------------------------------------------------------------------------------------------------------------------------------------------------------------------|
| QED              | 0.485    | A measure of drug-likeness based on the concept of desirability; attractive: >0.67; unattractive: 0.49~0.67; too complex: <0.34.                                                               |
| SAscore          | 3.165    | Synthetic accessibility score is designed to estimate ease of synthesis of drug-like molecules. SAscore $\geq$ 6, difficult to synthesize; SAscore < 6, easy to synthesize.                    |
| Fsp <sup>3</sup> | 0.6      | The number of sp <sup>3</sup> hybridized carbons/total carbon count, correlating with melting point and solubility. Fsp <sup>3</sup> $\geq$ 0.42 is considered a suitable value.               |
| MCE-18           | 15.0     | MCE-18 stands for medicinal chemistry evolution. MCE-18 $\geq$ 45 is considered a suitable value.                                                                                              |
| NPscore          | 2.359    | Natural-product-likeness score. This score is typically in the range of -5 to 5. The higher the score is, the higher the probability is that the molecule is an NP.                            |
| Lipinski Rule    | Accepted | MW $\leq$ 500; logP $\leq$ 5; Hacc $\leq$ 10; Hdon $\leq$ 5. If two properties are out of range, a poor absorption or permeability is possible; one property being out of range is acceptable. |
| Pfizer Rule      | Rejected | logP > 3; TPSA < 75; compounds with a high log P (>3) and low TPSA (<75) are likely to be toxic.                                                                                               |
| GSK Rule         | Rejected | MW $\leq$ 400; logP $\leq$ 4; compounds satisfying the GSK rule may have a more favorable ADMET profile.                                                                                       |
| Golden Triangle  | Rejected | 200 $\leq$ MW $\leq$ 500; -2 $\leq$ logD $\leq$ 5; compounds satisfying the Golden Triangle rule may have a more favorable ADMET profile.                                                      |
| PAINS            | 0 alerts | Pan-assay interference compounds, frequent hitters, $\alpha$ -screen artifacts and reactive compound.                                                                                          |
| ALARM NMR        | 0 alerts | Thiol reactive compounds.                                                                                                                                                                      |
| BMS              | 0 alerts | Undesirable, reactive compounds.                                                                                                                                                               |
| Chelator Rule    | 0 alerts | Chelating compounds.                                                                                                                                                                           |

**Table S3.** The absorption of compound *d*-limonene.

| <b>Property</b>        | <b>Value</b> | <b>Comment</b>                                                                                                                                                              |
|------------------------|--------------|-----------------------------------------------------------------------------------------------------------------------------------------------------------------------------|
| Caco-2<br>Permeability | -4.32        | Optimal: higher than $-5.15$ log unit                                                                                                                                       |
| MDCK<br>Permeability   | 1.9e-05      | Low permeability: $<2 \times 10^{-6}$ cm/s<br>Medium permeability: $2-20 \times 10^{-6}$ cm/s<br>High passive permeability: $>20 \times 10^{-6}$ cm/s                       |
| Pgp-inhibitor          | 0.002        | Category 1: inhibitor; Category 0: non-inhibitor; the output value is the probability of being Pgp-inhibitor                                                                |
| Pgp-substrate          | 0.0          | Category 1: substrate; Category 0: non-substrate; the output value is the probability of being Pgp-substrate                                                                |
| HIA                    | 0.003        | Human intestinal absorption; Category 1: HIA+(HIA $< 30\%$ ); Category 0: HIA-(HIA $< 30\%$ ); the output value is the probability of being HIA+                            |
| F <sub>20%</sub>       | 0.818        | 20% Bioavailability; Category 1: F20%+ (bioavailability $< 20\%$ ); Category 0: F20%- (bioavailability $\geq 20\%$ ); The output value is the probability of being F20% +   |
| F <sub>30%</sub>       | 0.798        | 30% Bioavailability; Category 1: F30% + (bioavailability $< 30\%$ ); Category 0: F30% - (bioavailability $\geq 30\%$ ); The output value is the probability of being F30% + |

**Table S4.** The properties of the drug distribution of compound *d*-limonene.

| <b>Property</b>    | <b>Value</b> | <b>Comment</b>                                                                                                          |
|--------------------|--------------|-------------------------------------------------------------------------------------------------------------------------|
| PPB                | 86.38%       | Plasma protein binding; optimal: <90%. Drugs with high protein binding may have a low therapeutic index.                |
| VD                 | 86.38%       | Volume distribution; optimal: 0.04–20 L/kg.                                                                             |
| BBB<br>Penetration | 86.38%       | Blood–brain barrier penetration; Category 1: BBB+; Category 0: BBB–; the output value is the probability of being BBB+. |
| Fu                 | 9.244%       | The fraction unbound in plasma; low: <5%; middle: 5~20%; high: >20%.                                                    |

**Table S5.** The properties of the drug metabolism of compound *d*-limonene.

| <b>Property</b>   | <b>Value</b> | <b>Comment</b>                                                                                               |
|-------------------|--------------|--------------------------------------------------------------------------------------------------------------|
| CYP1A2 inhibitor  | 0.678        | Category 1: inhibitor; Category 0: non-inhibitor; the output value is the probability of being an inhibitor. |
| CYP1A2 substrate  | 0.652        | Category 1: substrate; Category 0: non-substrate; the output value is the probability of being a substrate   |
| CYP2C19 inhibitor | 0.223        | Category 1: inhibitor; Category 0: non-inhibitor; the output value is the probability of being an inhibitor  |
| CYP2C19 substrate | 0.834        | Category 1: substrate; Category 0: non-substrate; the output value is the probability of being a substrate   |
| CYP2C9 inhibitor  | 0.06         | Category 1: inhibitor; Category 0: non-inhibitor; the output value is the probability of being an inhibitor. |
| CYP2C9 substrate  | 0.804        | Category 1: substrate; Category 0: non-substrate; the output value is the probability of being a substrate.  |
| CYP2D6 inhibitor  | 0.02         | Category 1: inhibitor; Category 0: non-inhibitor; the output value is the probability of being an inhibitor. |
| CYP2D6 substrate  | 0.874        | Category 1: substrate; Category 0: non-substrate; the output value is the probability of being a substrate.  |
| CYP3A4 inhibitor  | 0.057        | Category 1: inhibitor; Category 0: non-inhibitor; the output value is the probability of being an inhibitor. |
| CYP3A4 substrate  | 0.253        | Category 1: substrate; Category 0: non-substrate; the output value is the probability of being a substrate.  |

**Table S6.** The properties of the drug excretion of compound *d*-limonene.

| <b>Property</b> | <b>Value</b> | <b>Comment</b>                                                                                                                                                        |
|-----------------|--------------|-----------------------------------------------------------------------------------------------------------------------------------------------------------------------|
| CL              | 11.517       | Clearance; high: >15 mL/min/kg; moderate: 5–15 mL/min/kg; low: <5 mL/min/kg.                                                                                          |
| T1/2            | 0.233        | Category 1: long half-life; Category 0: short half-life; long half-life: >3 h; short half-life: <3 h; the output value is the probability of having a long half-life. |

**Table S7.** The properties of the drug toxicity of compound *d*-limonene

| Property                | Value | Comment                                                                                                                                                            |
|-------------------------|-------|--------------------------------------------------------------------------------------------------------------------------------------------------------------------|
| hERG Blockers           | 0.023 | Category 1: active; Category 0: inactive; the output value is the probability of being active.                                                                     |
| H-HT                    | 0.69  | Human hepatotoxicity; Category 1: H-HT positive (+); Category 0: H-HT negative (-); the output value is the probability of being toxic.                            |
| DILI                    | 0.037 | Drug-induced liver injury. Category 1: drugs with a high risk of DILI; Category 0: drugs with no risk of DILI. The output value is the probability of being toxic. |
| AMES Toxicity           | 0.007 | Category 1: AMES positive (+); Category 0: AMES negative (-); the output value is the probability of being toxic.                                                  |
| Rat Oral Acute Toxicity | 0.017 | Category 0: low toxicity; Category 1: high toxicity; the output value is the probability of being highly toxic.                                                    |
| FDAMDD                  | 0.309 | Maximum recommended daily dose; Category 1: FDAMDD (+); Category 0: FDAMDD (-); the output value is the probability of being positive.                             |
| Skin Sensitization      | 0.355 | Category 1: sensitizer; Category 0: non-sensitizer; the output value is the probability of being a sensitizer.                                                     |
| Carcinogenicity         | 0.992 | Category 1: carcinogens; Category 0: non-carcinogens; the output value is the probability of being toxic.                                                          |
| Eye corrosion           | 0.849 | Category 1: corrosive; Category 0: noncorrosive; the output value is the probability of being corrosive.                                                           |
| Eye irritation          | 0.981 | Category 1: irritants; Category 0: non-irritants; the output value is the probability of being an irritant.                                                        |
| Respiratory Toxicity    | 0.216 | Category 1: respiratory toxicants; Category 0: respiratory non-toxicants; the output value is the probability of being toxic.                                      |



**Table S8.** Toxicophore rules of compound *d*-limonene

| <b>Property</b>                   | <b>Value</b> | <b>Comment</b>                                                    |
|-----------------------------------|--------------|-------------------------------------------------------------------|
| Acute Toxicity Rule               | 0 alerts     | 20 substructures; acute toxicity during oral administration       |
| Genotoxic Carcinogenicity Rule    | 0 alert      | 117 substructures; carcinogenicity or mutagenicity                |
| Nongenotoxic Carcinogenicity Rule | 0 alerts     | 23 substructures; carcinogenicity through nongenotoxic mechanisms |
| Skin Sensitization Rule           | 0 alerts     | 155 substructures; skin irritation                                |
| Aquatic Toxicity Rule             | 1 alerts     | 99 substructures; toxicity to liquid (water)                      |
| Nonbiodegradable Rule             | 0 alerts     | 19 substructures; nonbiodegradable                                |
| SureChEMBL Rule                   | 0 alerts     | 164 substructures; MedChem unfriendly status                      |

**Table S9.** The role results on *in silico* molecular docking model of Naringin and small ligand in receptor, enzyme 2VF5 docked to enzyme 2VF5.

| Entry               | Active pose | Free Energy of Binding <sup>[a]</sup> | K <sub>i</sub> <sup>[b]</sup> | The number of hydrogen bonds <sup>[c]</sup> | The property and bond length <sup>[d]</sup>                                                                                                                                                                                                                                                                                                                                                                                                                                                                                                                                                                                 |
|---------------------|-------------|---------------------------------------|-------------------------------|---------------------------------------------|-----------------------------------------------------------------------------------------------------------------------------------------------------------------------------------------------------------------------------------------------------------------------------------------------------------------------------------------------------------------------------------------------------------------------------------------------------------------------------------------------------------------------------------------------------------------------------------------------------------------------------|
| Naringin            | 60          | -5.51                                 | 91.22                         | 4                                           | X:Gly301:N - <b>Naringin</b> (2.85 Å)<br>X:Lys487:N- <b>Naringin</b> :O (2.55 Å)<br>X:Ala496:N- <b>Naringin</b> :O (2.82 Å)<br><b>Naringin</b> : H - X:Lys603:O (1.87 Å)                                                                                                                                                                                                                                                                                                                                                                                                                                                    |
| <b>Small ligand</b> | 83          | -5.38                                 | 114                           | 13                                          | X:Thr 302:O- <b>Small ligand</b> (2.86 Å)<br>X:Gln 348:N- <b>Small ligand</b> (3.11 Å)<br>X:Ser 349:N- <b>Small ligand</b> (2.95 Å)<br>X:Ser 349:O- <b>Small ligand</b> (2.66 Å)<br>X:Thr 352:O- <b>Small ligand</b> (3.00 Å)<br>X:Ser 401:N- <b>Small ligand</b> (3.06 Å)<br><b>Small ligand</b> : H-X:Glu 488:O (2.03 Å)<br><b>Small ligand</b> : H-X:Glu 488:O (1.88 Å)<br><b>Small ligand</b> : H-X:Glu 488:O (2.05 Å)<br><b>Small ligand</b> : H-X:Ala 602:O (1.88 Å)<br><b>Small ligand</b> : H-X:Ser 349:O (1.90 Å)<br><b>Small ligand</b> : H- X:Lys 603:O (2.15 Å)<br><b>Small ligand</b> : H-X:Lys 603:O (1.92 Å) |
| <b>Fluconazole</b>  | 87          | -5.55                                 | 86.10                         | 4                                           | X:Thr302:N- <b>Fluconazole</b> :O (3.00 Å)<br>X:Ser303:N- <b>Fluconazole</b> :O (3.05 Å)<br>X:Ser349:O- <b>Fluconazole</b> :N (2.77Å)<br><b>Fluconazole</b> :H-X:Cys300:O (1.94 Å)                                                                                                                                                                                                                                                                                                                                                                                                                                          |

**Table S10.** The values of RMSD of naringin, small ligand in enzyme 2VF5, and Fluconazole, standard drug.

| RMSD, Å            | Naringin     | Small ligand | Fluconazole  | Pose 60      | Pose 83      | Pose 87 (Reference) |
|--------------------|--------------|--------------|--------------|--------------|--------------|---------------------|
| Naringin           | 0            | 3.911        | 3.453        | 6.186        | 4.254        | 2.581               |
| Small ligand       | 3.911        | 0            | 2.924        | 4.331        | 2.483        | 2.098               |
| <b>Fluconazole</b> | <b>3.453</b> | <b>2.924</b> | <b>0</b>     | <b>4.463</b> | <b>2.453</b> | <b>2.370</b>        |
| Pose 60            | 6.186        | 4.331        | 4.463        | 0            | 4.705        | 2.896               |
| Pose 83            | 4.254        | 2.483        | 2.453        | 4.705        | 0            | 2.453               |
| <b>Pose 87</b>     | <b>2.581</b> | <b>2.098</b> | <b>2.370</b> | <b>2.896</b> | <b>2.453</b> | <b>0</b>            |

Table S11. NMR data of naringin in DMSO-*d*<sub>6</sub>

| C      | Naringin   |                                                                             |            |                                                                             |                       |
|--------|------------|-----------------------------------------------------------------------------|------------|-----------------------------------------------------------------------------|-----------------------|
|        | $\delta_C$ | $\delta_H$ mult., ( <i>J</i> in Hz)                                         | $\delta_C$ | $\delta_H$ mult., ( <i>J</i> in Hz)                                         | HMBC (H→C)            |
|        | <b>2S</b>  |                                                                             | <b>2R</b>  |                                                                             |                       |
| 2      | 78.6       | 5.49 (1H, <i>dd</i> , 13.2; 3.0)                                            | 78.8       | 5.51 (1H, <i>dd</i> , 12.6; 3.0)                                            | C-4, C-1'             |
| 3      | 42.0       | 3.14-3.17 (1H, <i>m</i> , H-3eq)<br>2.72 (1H, <i>dd</i> , 13.2; 3.0, H-3ax) | 42.1       | 3.18-3.21 (1H, <i>m</i> , H-3ax)<br>2.73 (1H, <i>dd</i> , 13.8; 3.0, H-3eq) | C-4, C-1'             |
| 4      | 197.2      |                                                                             | 197.3      |                                                                             |                       |
| 5      | 163.0      |                                                                             | 163.0      |                                                                             |                       |
| 6      | 96.3       | 6.08 (1H, <i>d</i> , 2.4)                                                   | 96.4       | 6.09 (1H, <i>d</i> , 2.4)                                                   | C-5, C-7, C-10        |
| 7      | 164.7      |                                                                             | 164.9      |                                                                             |                       |
| 8      | 95.1       | 6.10 (1H, <i>d</i> , 2.4)                                                   | 95.2       | 6.11 (1H, <i>d</i> , 2.4)                                                   | C-6, C-7, C-9, C-10   |
| 9      | 162.8      |                                                                             | 162.9      |                                                                             |                       |
| 10     | 103.3      |                                                                             | 103.4      |                                                                             |                       |
| 1'     | 128.6      |                                                                             | 128.6      |                                                                             |                       |
| 2', 6' | 128.4      | 7.32 (1H, <i>d</i> , 8.4)                                                   | 128.5      | 7.33 (1H, <i>d</i> , 8.4)                                                   | C-2, C-1', C-3', C-4' |
| 3', 5' | 115.2      | 6.79 (1H, <i>d</i> , 8.4)                                                   | 115.2      | 6.80 (1H, <i>d</i> , 8.4)                                                   | C-1', C-2', C-4'      |
| 4'     | 157.8      |                                                                             | 157.9      |                                                                             |                       |
| 4'-OH  |            | 9.64 (1H, <i>s</i> )                                                        |            | 9.65 (1H, <i>s</i> )                                                        | C-4'                  |
| 5-OH   |            | 12.04 (1H, <i>s</i> )                                                       |            | 12.05 (1H, <i>s</i> )                                                       | C-5                   |
| Glc    |            |                                                                             |            |                                                                             |                       |
| 1''    | 97.3       | 5.13 (1H, <i>d</i> , 7.8)                                                   | 97.4       | 5.14 (1H, <i>d</i> , 7.8)                                                   | C-7                   |
| 2''    | 77.1       | 3.39 (1H, <i>m</i> )                                                        | 77.1       | 3.39 (1H, <i>m</i> )                                                        | C-1''                 |
| 3''    | 76.9       | 3.41 (1H, <i>m</i> )                                                        | 76.8       | 3.41 (1H, <i>m</i> )                                                        | C-2'', C-5''          |
| 4''    | 71.8       | 3.19 (1H, <i>m</i> )                                                        | 71.8       | 3.19 (1H, <i>m</i> )                                                        | C-3'', C-5''          |
| 5''    | 76.1       | 3.40 (1H, <i>m</i> )                                                        | 76.2       | 3.40 (1H, <i>m</i> )                                                        | C-4'', C-6''          |
| 6''    | 60.4       | 3.40 (1H, <i>m</i> )<br>3.65 (1H, <i>m</i> )                                | 60.4       | 3.40 (1H, <i>m</i> )<br>3.65 (1H, <i>m</i> )                                | C-5''                 |
| Rha    |            |                                                                             |            |                                                                             |                       |
| 1'''   | 100.4      | 5.09 (1H, <i>d</i> , 1.8)                                                   | 100.5      | 5.10 (1H, <i>d</i> , 1.8)                                                   | C-2'''                |
| 2'''   | 69.6       | 3.17 (1H, <i>m</i> )                                                        | 69.6       | 3.17 (1H, <i>m</i> )                                                        | C-1'''                |
| 3'''   | 70.4       | 3.67 (1H, <i>m</i> )                                                        | 70.4       | 3.67 (1H, <i>m</i> )                                                        | C-2''', C-4'''        |
| 4'''   | 70.5       | 3.30 (1H, <i>m</i> )                                                        | 70.5       | 3.30 (1H, <i>m</i> )                                                        | C-3''', C-5'''        |
| 5'''   | 68.3       | 3.69 (1H, <i>m</i> )                                                        | 68.3       | 3.69 (1H, <i>m</i> )                                                        | C-4''', C-6'''        |
| 6'''   | 18.0       | 1.14 (1H, <i>d</i> , 6.0)                                                   | 18.0       | 1.15 (1H, <i>d</i> , 6.0)                                                   | C-5'''                |

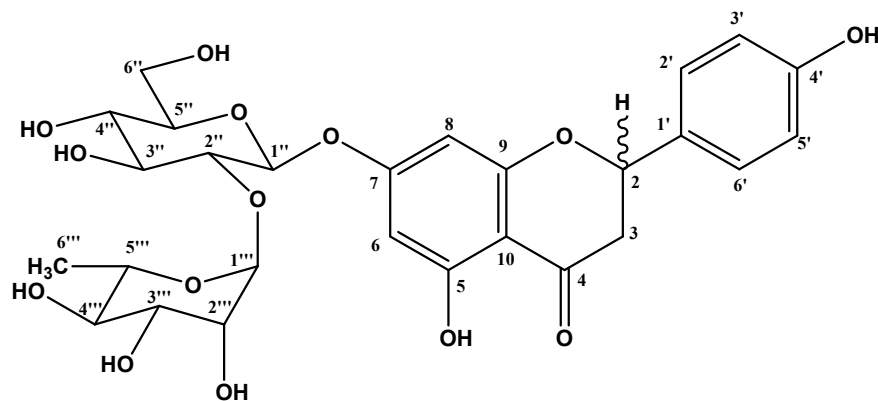

Figure S1. Chemical structure of naringin

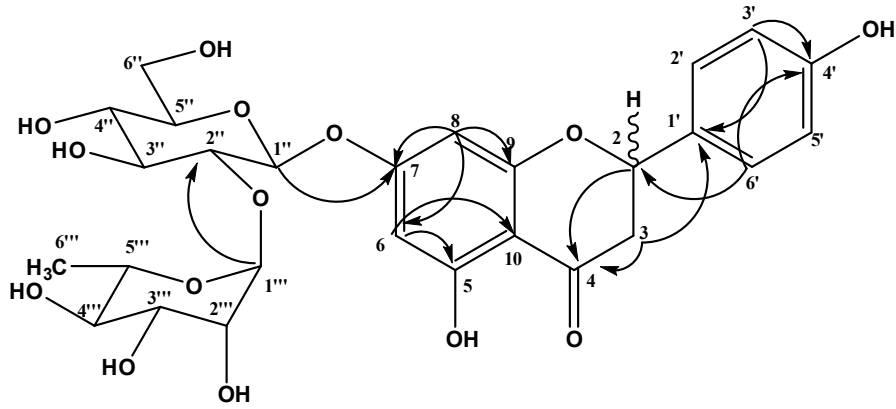

Figure S2. The key HMBC correlations of naringin

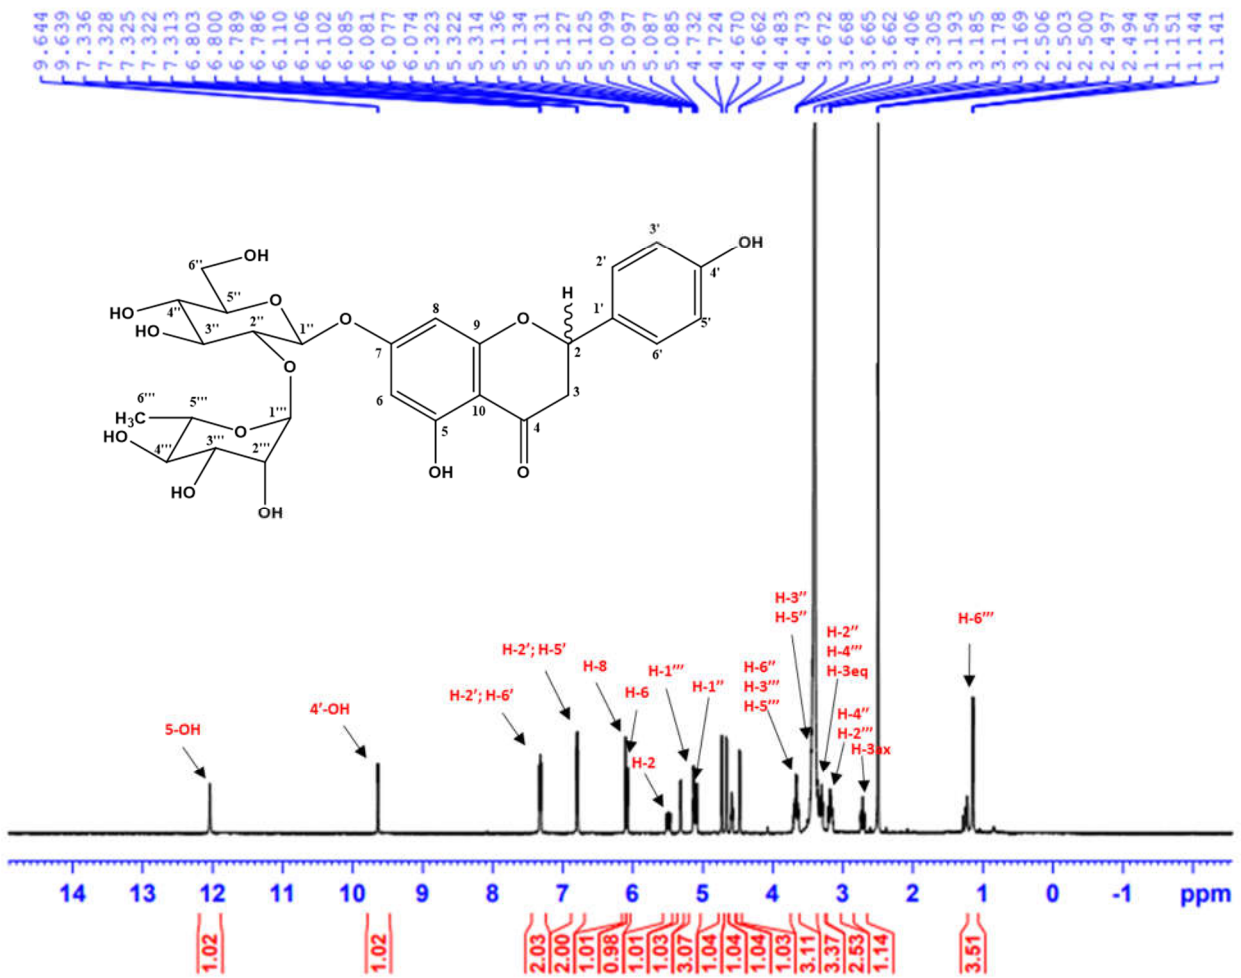

Figure S3. <sup>1</sup>H-NMR spectrum copy of naringin

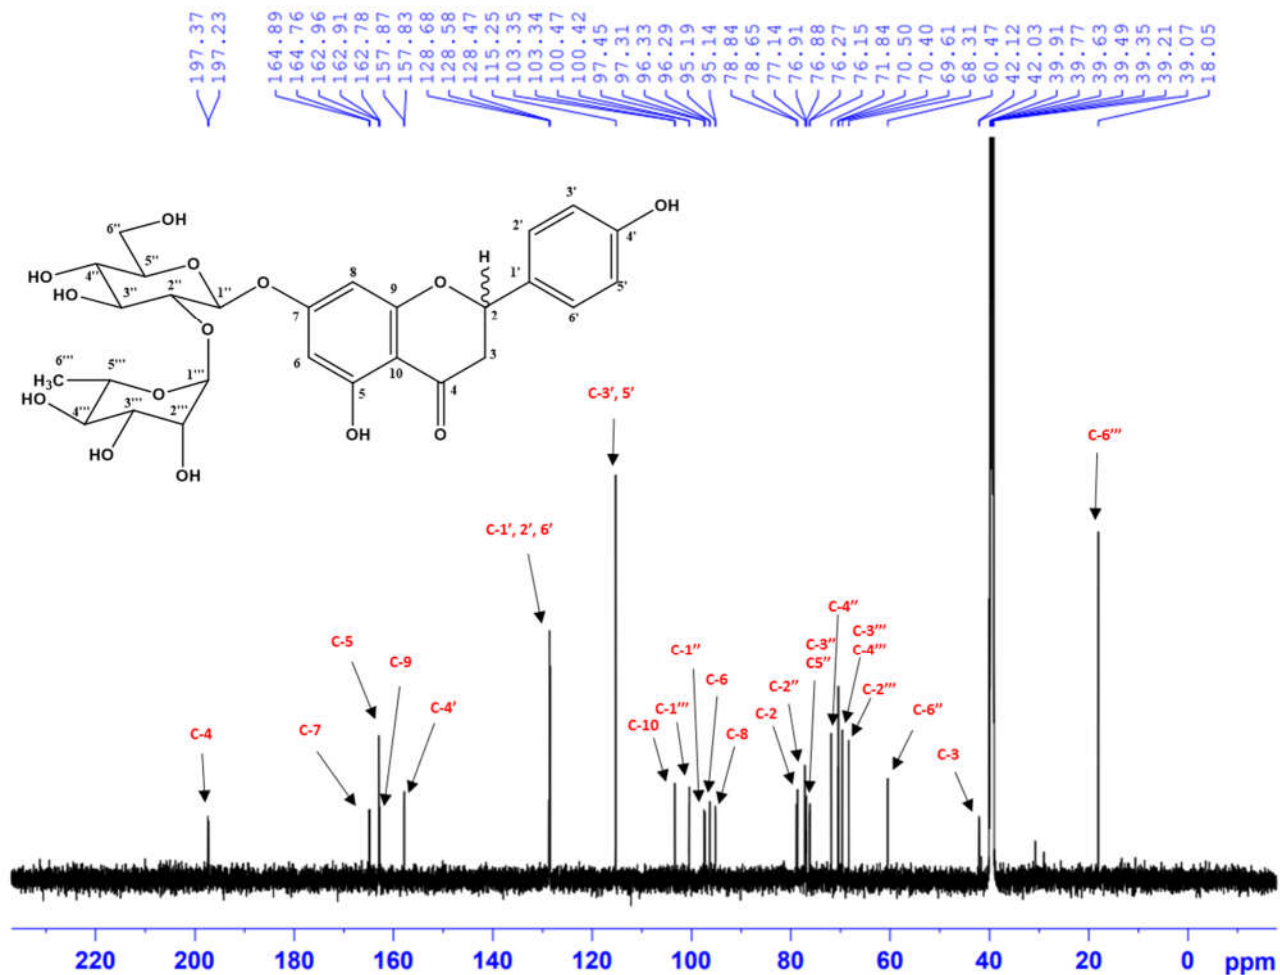

Figure S4. <sup>13</sup>C-NMR spectrum copy of naringin

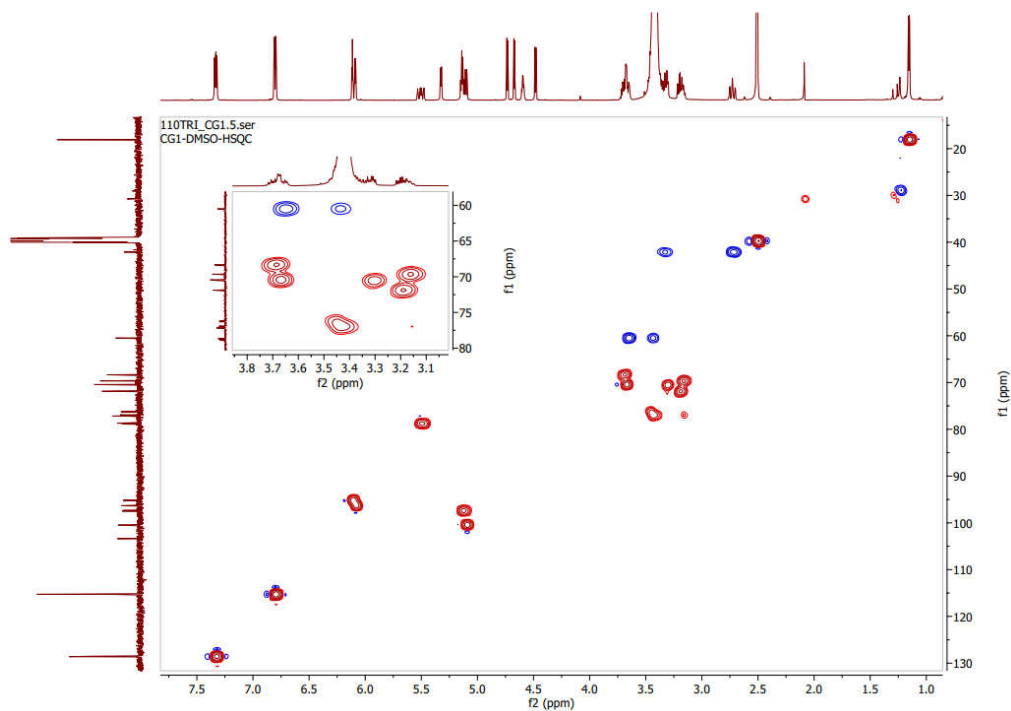

**Figure S5.** HSQC spectrum copy of naringin

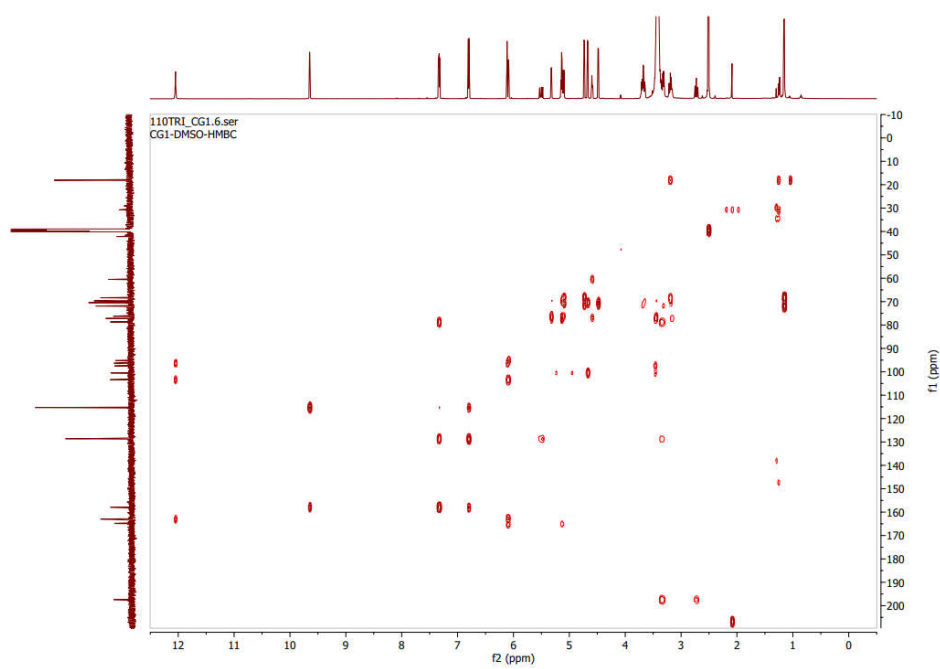

**Figure S6.** HMBC spectrum copy of naringin

User Spectra

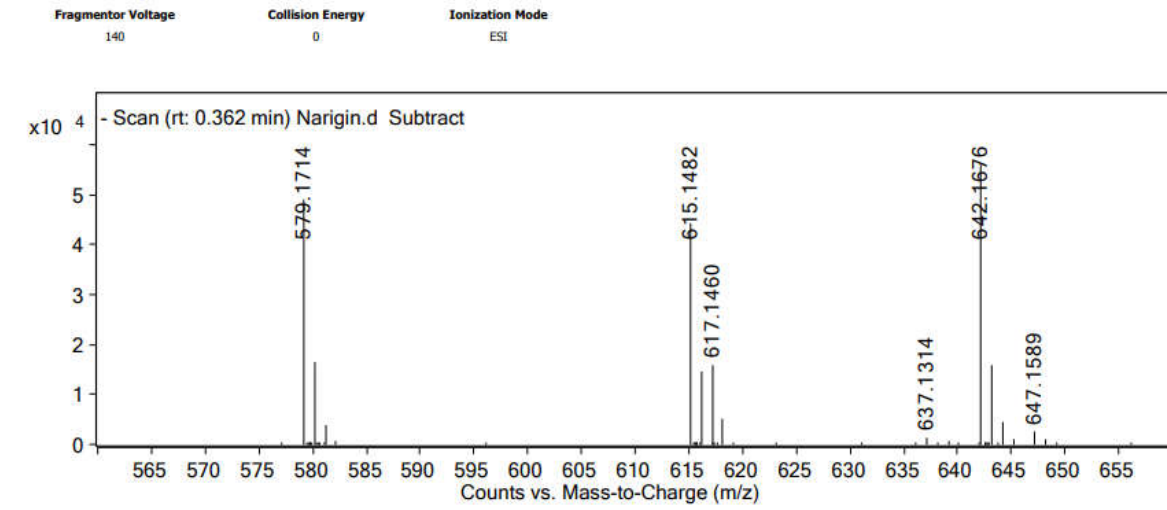

Peak List

| m/z      | z | Abund    |
|----------|---|----------|
| 132.8679 |   | 17043.91 |
| 134.8655 |   | 21154.85 |
| 136.8637 |   | 6658.37  |
| 579.1714 | 1 | 49013.24 |
| 580.175  | 1 | 16525.76 |
| 615.1482 | 1 | 44263.45 |
| 616.1516 | 1 | 14580.11 |
| 617.146  | 1 | 15905.95 |
| 642.1676 | 1 | 55881.25 |
| 643.1701 | 1 | 15682.34 |

Figure S7. HRMS spectrum copy of naringin



File :D:\2022\vienhoa\0118202203.D  
Operator :  
Acquired : 18 Jan 2022 12:39 using AcqMethod TINHDAU  
Instrument : Instrumen  
Sample Name: TD Buoi hoi nuoc  
Misc Info :  
Vial Number: 1

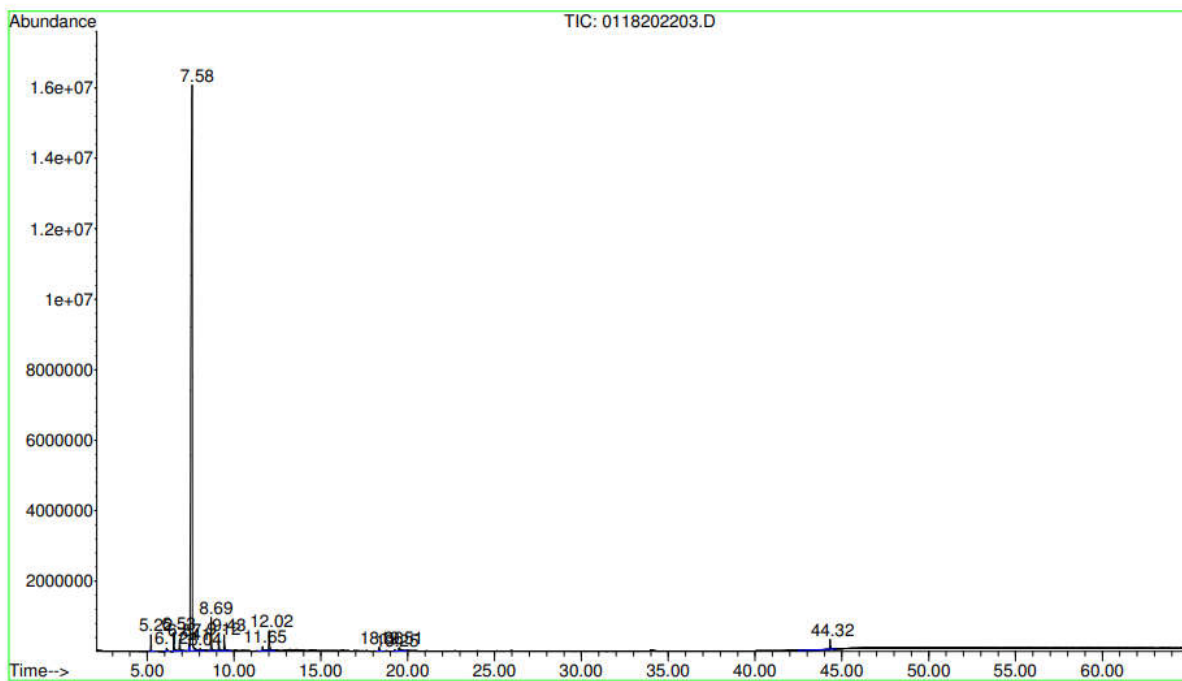

Figure S8. GCMS spectrum copy of HDEO

File :D:\2022\vienhoa\0118202205.D  
Operator :  
Acquired : 18 Jan 2022 15:29 using AcqMethod TINHDAU  
Instrument : Instrumen  
Sample Name: TD Bui CO2  
Misc Info :  
Vial Number: 1

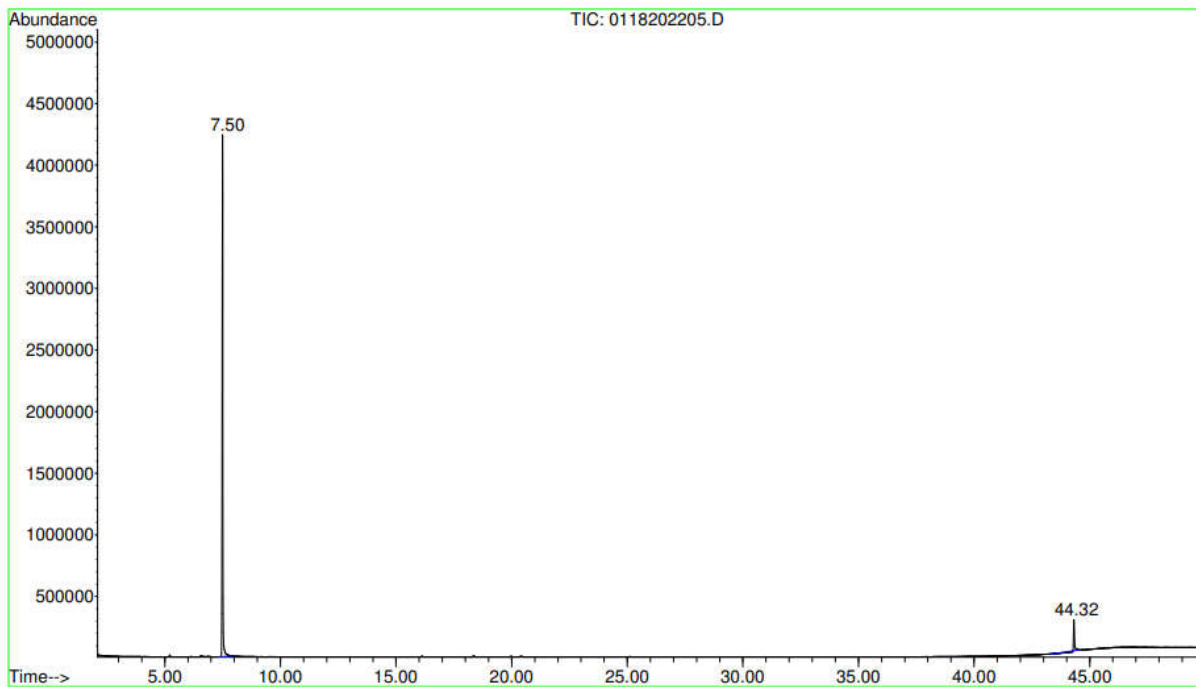

**Figure S9.** GCMS spectrum copy of SCEO

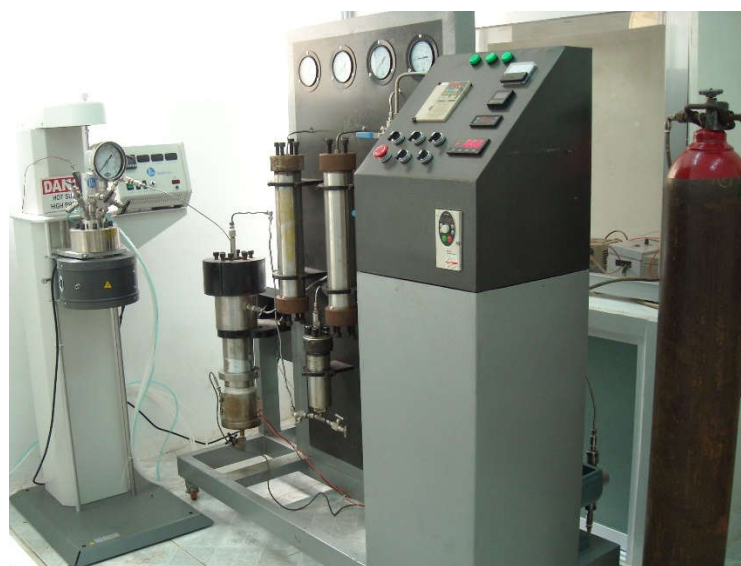

**Figure S10.** Supercritical CO<sub>2</sub> instrument made in Institute of Chemical Technology (ICT)-Vietnam  
Academy of Science and Technology (VAST) - Vietnam
